# Supplementary material for: Expression of ZjPSY, a Phytoene Synthase Gene from Zoysia japonica Affects Plant Height and Photosynthetic Pigment Contents
Source: MDPI journal article supplement (doi:10.3390/plants11030395), 2022-01-31
Supplement: s1 [file s1]

**Supplementary Table S1.** Primers used in the study

| Primer name    | Primer sequence (5'-3')                         |
|----------------|-------------------------------------------------|
| ArUBQ 10-F     | GGGCCTTGTATAATCCCTGAT                           |
| ArUBQ 10-R     | CCATCCTTAGAACCCAACAGC                           |
| PSY-qPCR-F2    | TTTTGCTGGACGACCTTATGACA                         |
| PSY-qPCR-R2    | AACCCGACAGTTCCTGCGACAT                          |
| ZjPSY-F        | GGTACACGACAGTAAGCGCATAC                         |
| ZjPSY-R        | ACTGCGTACTCCTTCCTTCTATCTA                       |
| pGBKT7-ZjPSY-F | ATCCCCGGGAATTCGGCCTCTTAGCTCTGGCTATTTCTC         |
| pGBKT7-ZjPSY-R | AGGAGGACCTGCATATGGCCGCTTTTCTTCCCCCTTGCGG        |
| 3302Y-ZjPSY-F  | CACGGGGGACTCTTGACCATGGTATTAGCTCTGGCTATTTCTC     |
| 3302Y-ZjPSY-R  | GGTACACGCGTACTAGTCAGATCGCTTTTCTTCCCCCTTGCGG     |
| YNE-ZjPSY-F    | TCGATAGTACTGTCGACCTCATGGCCATCATGCTTGTAAG        |
| YNE-ZjPSY-R    | ATCCCCGGGAGCGGTACCCTCGCTCTGGCTATTTCTCAGTG       |
| YCE-ZjJ2-F     | ACCTCGAGGGTACCGCTCCCATGGTACCAGATTACGCTCATA<br>T |
| YCE-ZjJ2-R     | ACATCGTATGGGTACATCCCAGGGTTTGACTTGATGAGAA        |
| ArCLH1-RT-F    | CGCAACATTAGACCCATCCA                            |
| ArCLH1-RT-R    | GGCTTTCGTCGCCTTACACT                            |
| ArNYC-RT-F     | CACCTCTTTCTTTCTTCGTCCTA                         |
| ArNYC-RT-R     | CAATCTTGACCCGACCCGTAT                           |
| ArNOL-RT-F     | TTTGCTGTTATGGCTGTTCCCT '                        |
| ArNOL-RT-R     | AGTTCCCTCACATCCTTCCCT'                          |
| ArPAL-RT-F     | ATAAGAGCAGCGACTAAGATGA                          |
| ArPAL-RT-R     | GGTAACCCGTTGTTGTAGAAAT                          |
| ArNCED-RT-F    | CGGAGACAGACGAGGTTGTAG                           |
| ArNCED-RT-R    | TGAGACTTTAGGCCACGGTTC                           |
| ArZDS-RT-F     | AGTCACTTGGTCGTCGGTTGT '                         |
| ArZDS-RT-R     | AATTTGGAGGCTGTTCTTGCT                           |
| ZjACT-F        | GGTCCTCTTCCAGCCATCCTTC                          |
| ZjACT-R        | GTGCAAGGGCAGTGATCTCCTTG                         |

The efficiency of primer pair PSY-qPCR-F2/R2 is 90.0135, R2=0.9997; ArCLH1-RT-F/R, 104.2102%, R2=0.999; ArNYC-RT-F/R, 102.1831%, R2=0.9998; ArNOL-RT-F/R, 90.4131%, R2=0.9996; ArPAL-RT-F/R, R2=86.5855%, 0.9991; ArNCED-RT-F/R, 107.4709%, R2= 0.9863; ArZDS-RT-F/R, 93.8269%, R2=0.9955.

**Supplementary Table S2.** cDNA inserts in library prey vectors.

| Serial number | Sample                              | Growth Condition                      | Time of growth                                            |
|---------------|-------------------------------------|---------------------------------------|-----------------------------------------------------------|
| 1             | The whole plant                     | Pots                                  | 1 month, 3 months, 6 months                               |
| 2             | The whole plant                     | MS plates with 200 mM NaCl            | 1 month                                                   |
| 3             | The whole plant                     | MS plates with 500 mM mannitol        | 1 month                                                   |
| 4             | The whole plant                     | MS plates with 10 $\mu$ M GA3         | 1 month                                                   |
| 5             | The whole plant                     | MS plates with 10 $\mu$ M ABA         | 1 month                                                   |
| 6             | The whole plant                     | MS plates with 10 $\mu$ M MeJA        | 1 month                                                   |
| 7             | The whole plant                     | MS plates with 0.5 mM SA              | 1 month                                                   |
| 8             | The whole plant                     | MS plates and MS plates without light | MS plates for 1 month and MS plates without light for 5d. |
| 9             | All cDNA mentioned in paragraph 4.6 |                                       |                                                           |

Total RNA was isolated from each sample as described in paragraph 4.2. Growth Condition.

All pots were kept at 28/23°C (day/night) with 16h (at 400  $\mu$ mol/m<sup>2</sup>/s)/8h photoperiod and 50% humidity.

All Murashige and Skoog plates (4.43 g/L Murashige and Skoog powder, 8 g/L agar, pH 5.8) were kept with a 16h white light (at 90  $\mu$ mol/m<sup>2</sup>/s)/8h dark cycle and 50% humidity at 25°C. Shade-treated MS culture bottles are wrapped in tin foil.



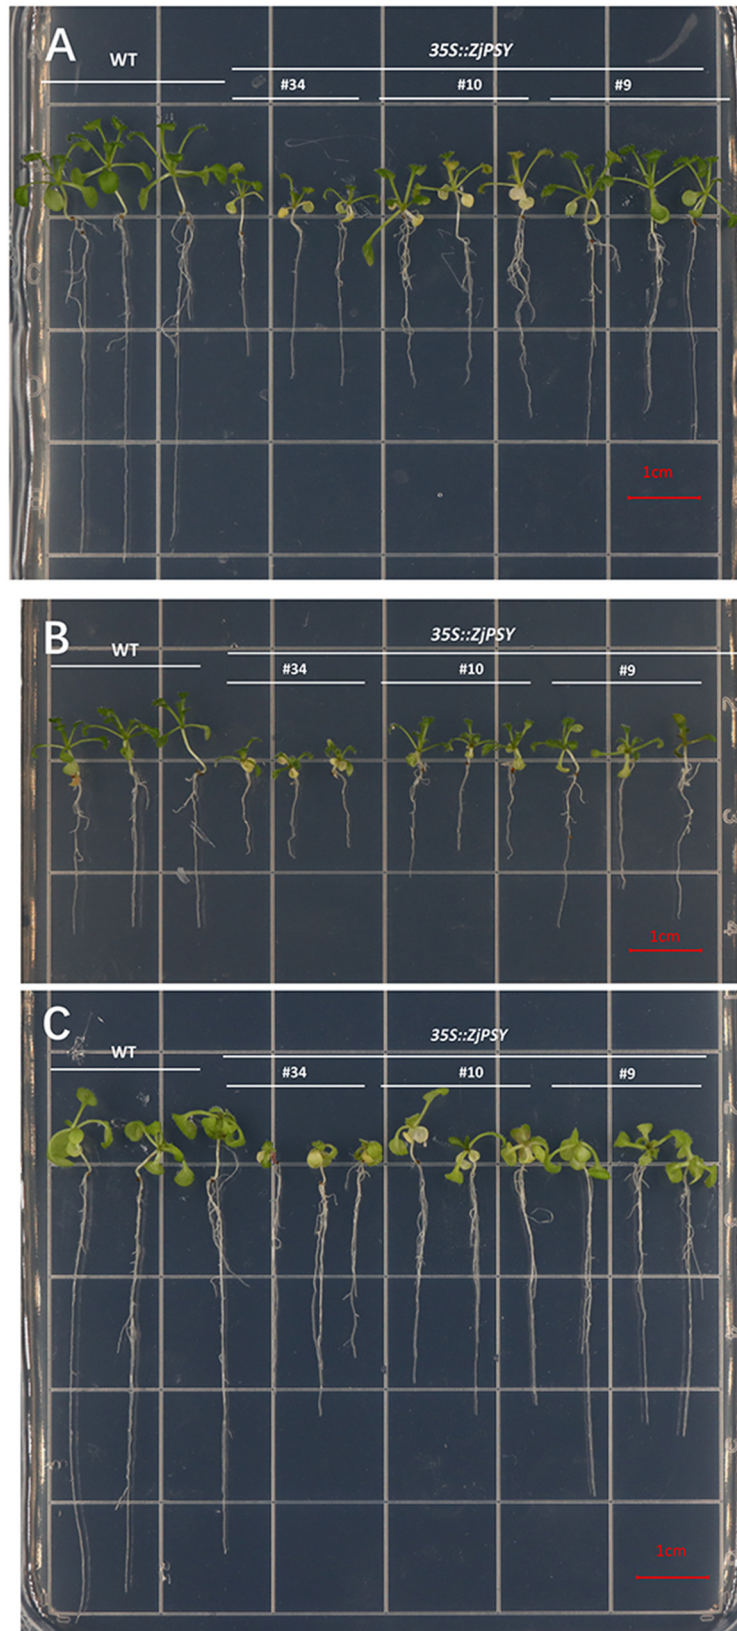

**Supplementary Figure S2.** Performance of wild-type and transgenic plants. The transgenic and wild-type *Arabidopsis* grown in MS agar plates for 14 days (A). 500 mM mannitol (B) and 200 mM NaCl (C) were added to MS medium in drought treatment and salt treatment groups, respectively.
